# Supplementary material for: Molecular and serological investigations of Batai virus in cattle and goats in the border area of Yunnan, China (2021–2022)
Source: PubMed Central journal article supplement (PMC11322338; doi:10.3389/fvets.2024.1433699), 2024-07-31
Supplement: Data_Sheet_1.pdf [file Data_Sheet_1.pdf]

*Supplementary Material*

**Molecular and serological investigations of Batai Virus in Cattle and Goats in the Border Area of Yunnan, China (2021–2022)**

Zishuo Lu<sup>1†</sup>, Xingxiu Yan<sup>1†</sup>, Guiying Fan<sup>1</sup>, Lixia Li<sup>1</sup>, Xiutao Sun<sup>2</sup>, Huijun Lu<sup>3</sup>, Ningyi Jin<sup>3</sup>, Hao Liu<sup>1\*</sup>, Wenchao Sun<sup>4\*</sup>

**\* Correspondence:**

Hao Liu

liuhao\_lh@hotmail.com

Wen-Chao Sun

Email:sunwenchao\_131@126.com

**1 Supplementary Figures**

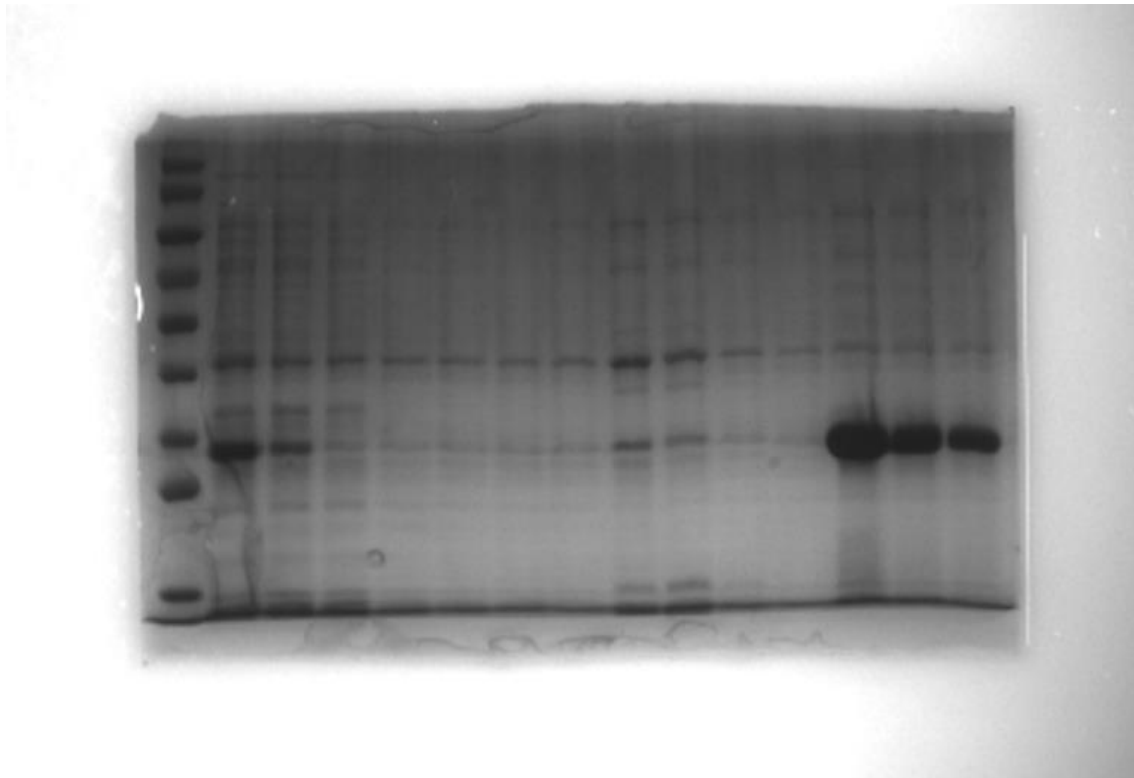

**Figure S1.** The original image files of western blot in Figure 1 (A)

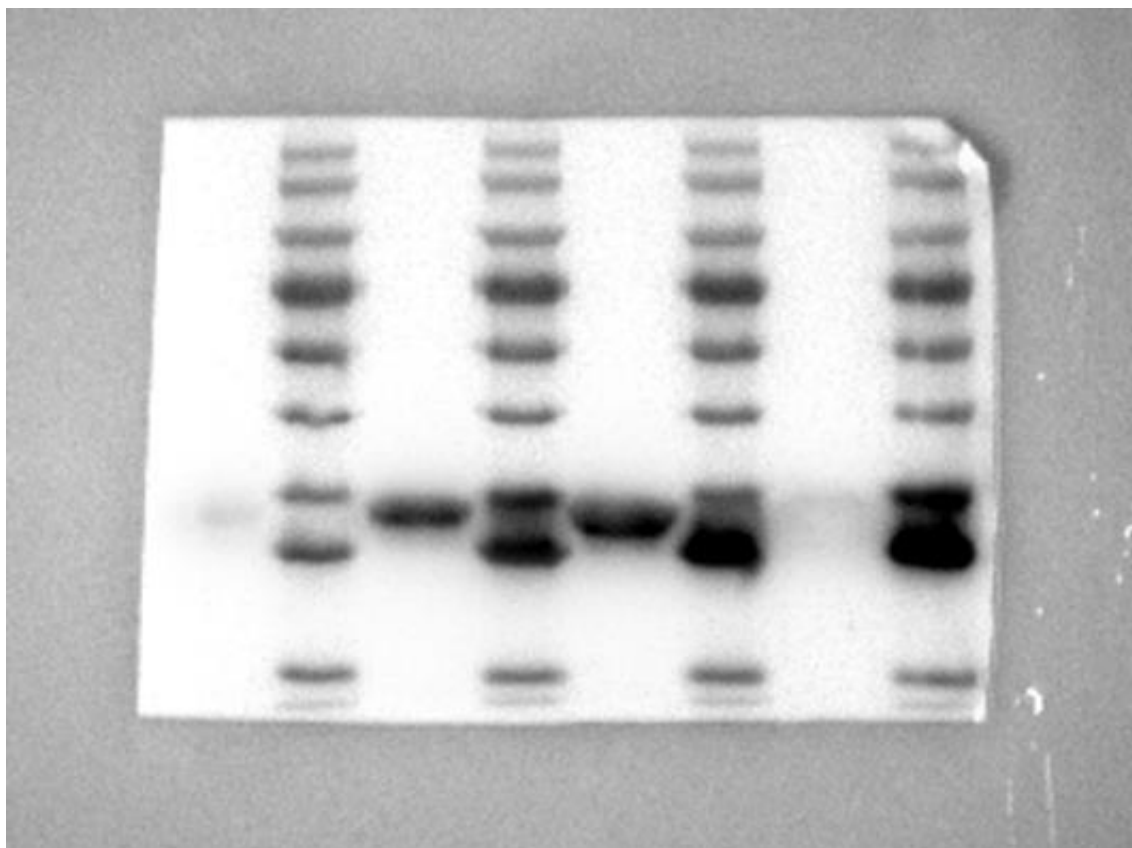

**Figure S2.** The original image files of western blot in Figure 1 (B)

**A**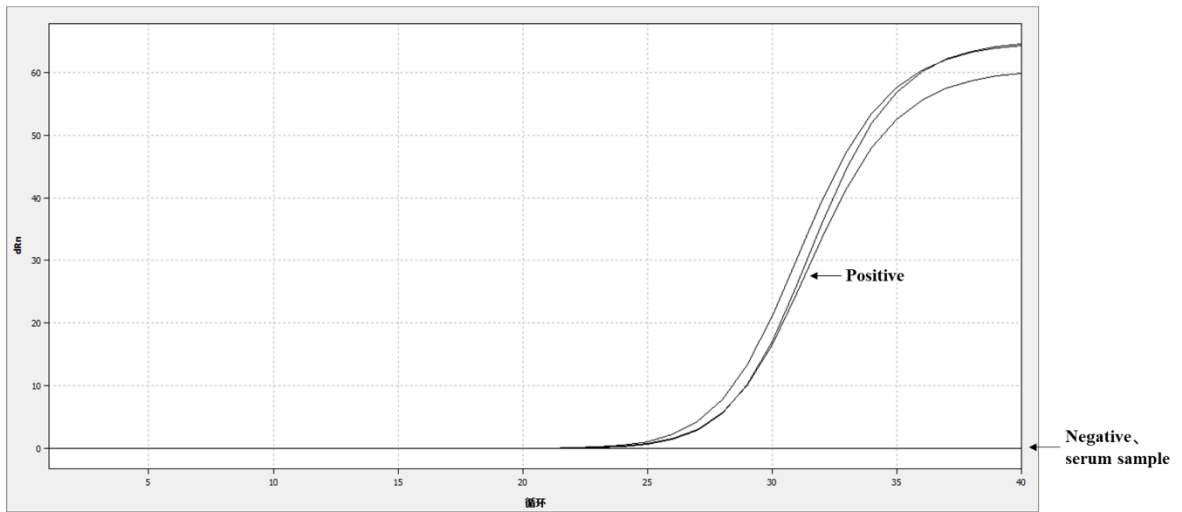**B**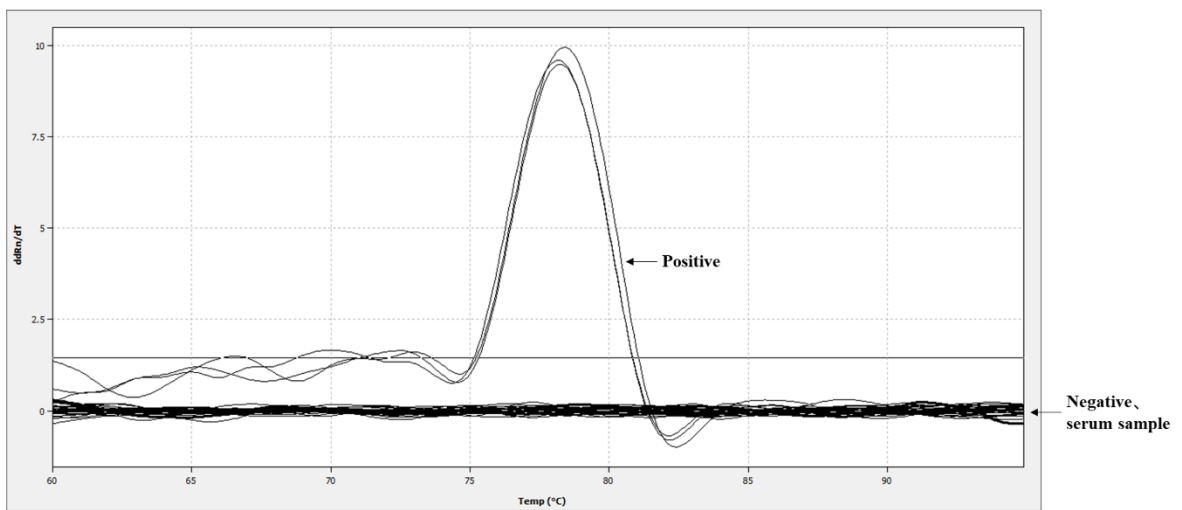

**Figure S3.** RT-qPCR results. (A): Amplification map; (B): Dissolution curve.
